# Supplementary material for: Systematic pan-cancer analysis of somatic allele frequency
Source: PubMed Central journal article supplement (PMC5956099; doi:10.1038/s41598-018-25462-0), 2018-05-16
Supplement: 41598_2018_25462_MOESM1_ESM.pdf [file 41598_2018_25462_MOESM1_ESM.pdf]

# Systematic pan-cancer analysis of somatic allele frequency

Liam Spurr<sup>1,2</sup>, Muzi Li<sup>2,3</sup>, Nawaf Alomran<sup>2,3</sup>, Qianqian Zhang<sup>1,4</sup>, Paula Restrepo<sup>1,2</sup>, Mercedeh Movassagh<sup>2,5</sup>, Chris Trenkov<sup>2</sup>, Nerissa Tunnessen<sup>2</sup>, Tatiyana Apanasovich<sup>6</sup>, Keith A. Crandall<sup>7</sup>, Nathan Edwards<sup>2,3</sup>, Anelia Horvath<sup>1,2,4,7\*</sup>

<sup>1</sup>*Department of Pharmacology and Physiology, School of Medicine and Health Sciences, The George Washington University, Washington, DC 20037, USA*

<sup>2</sup>*McCormick Genomics and Proteomics Center, School of Medicine and Health Sciences, The George Washington University, Washington, DC 20037, USA*

<sup>3</sup>*Department of Biochemistry and Molecular and Cellular Biology, Georgetown University, School of Medicine, Washington, DC 20057, USA*

<sup>4</sup>*Department of Biochemistry and Molecular Medicine, School of Medicine and Health Sciences, The George Washington University, Washington, DC 20037, USA*

<sup>5</sup>*University of Massachusetts Medical School, Program in Bioinformatics and Integrative Biology, Worcester, MA*

*01605, USA*

<sup>6</sup>*Department of Statistics, The George Washington University, Washington, DC 20037, US*

<sup>7</sup>*Computational Biology Institute, Milken Institute School of Public Health, The George Washington University, Washington, DC, 20052, USA.*

*\*Correspondence to horvatha@gwu.edu*

**Supplementary Figure 1.** Distribution of  $V_{R:D}$  in somatic mutations categories in CGC vs. non-CGC genes based on their predicted effect on the protein function: **(a)** Premature terminating variants, PTVs, **(b)** Missense variants **(c)** Non-coding variants. In the majority of the comparisons, higher  $V_{R:D}$  was estimated in the CGC genes.

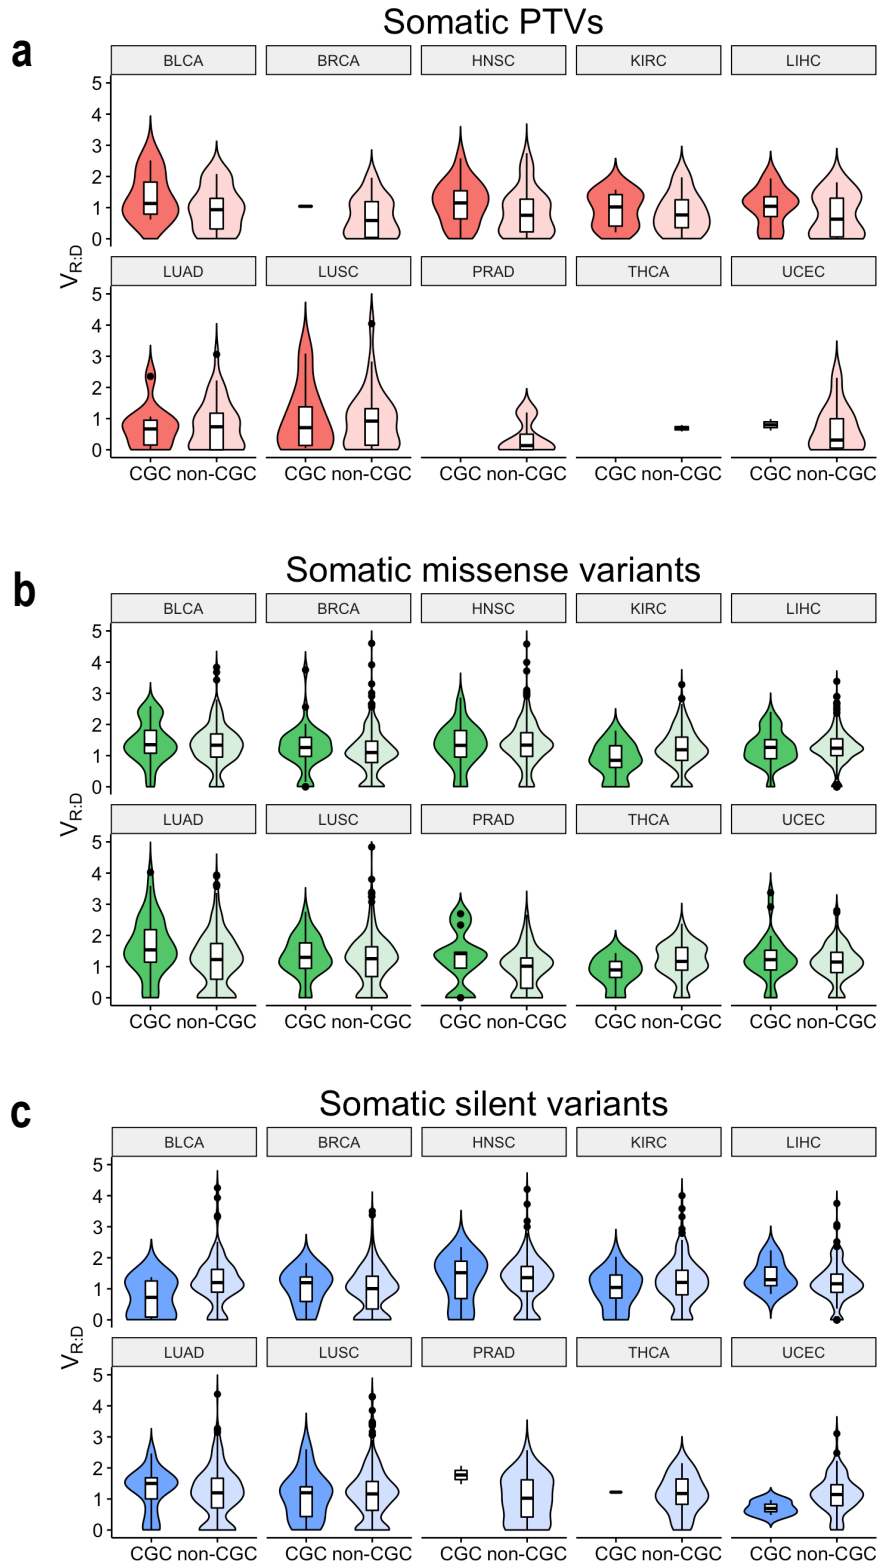

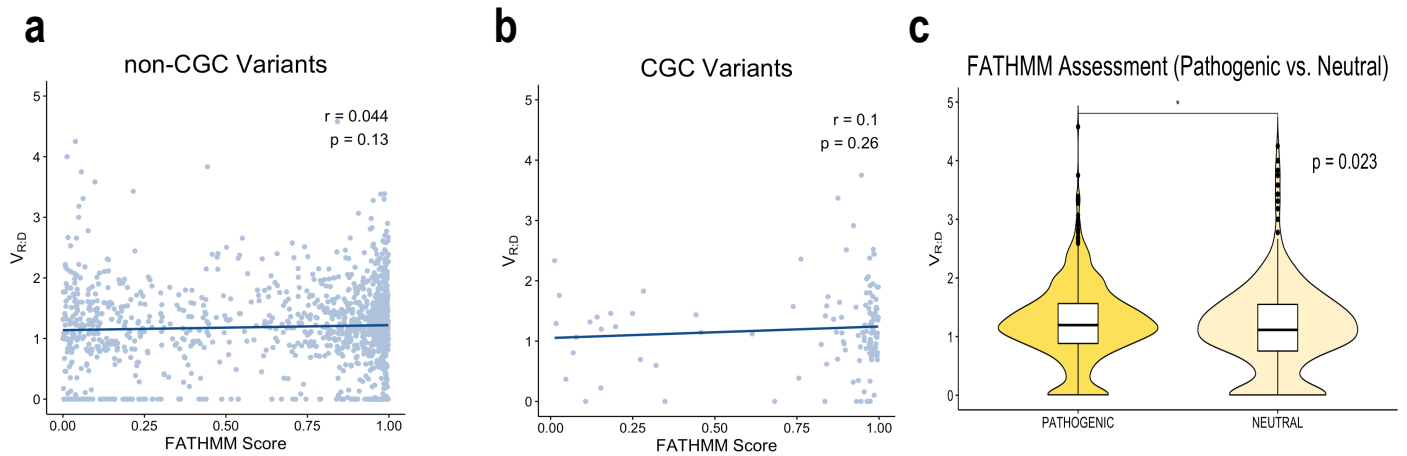

**Supplementary Figure 2. a.**

Correlation between  $V_{R:D}$  and pathogenicity score predicted through FATHMM for non-CGC variants, and **(b)** for CGC variants. **c.** Distribution of  $V_{R:D}$  in pathogenic vs. neutral somatic variants as assessed by FATHMM. **d.**

Correlation between  $V_{R:D}$  and PolyPhen score for non-CGC variants, and **(e)** for CGC variants. **f.** Correlation between  $V_{R:D}$  and GERP score for non-CGC variants, and **(g)** for CGC variants. **h.** Correlation between  $V_{R:D}$  and GERP score for non-CGC variants, and **(i)** for CGC variants.

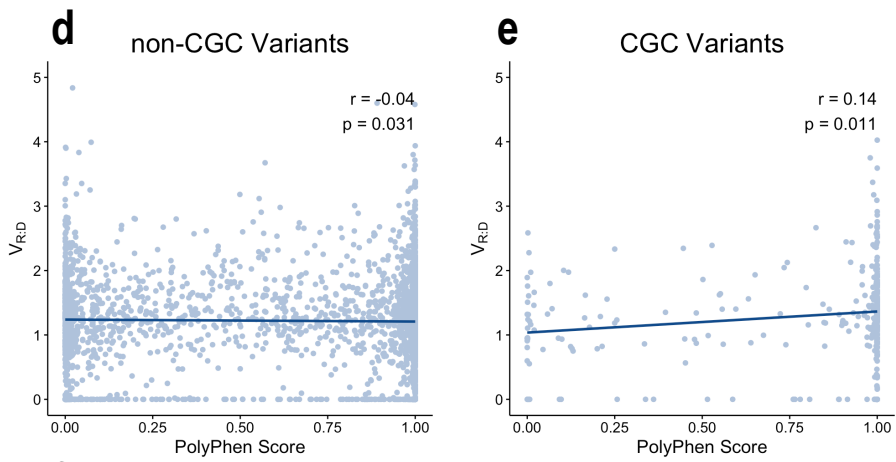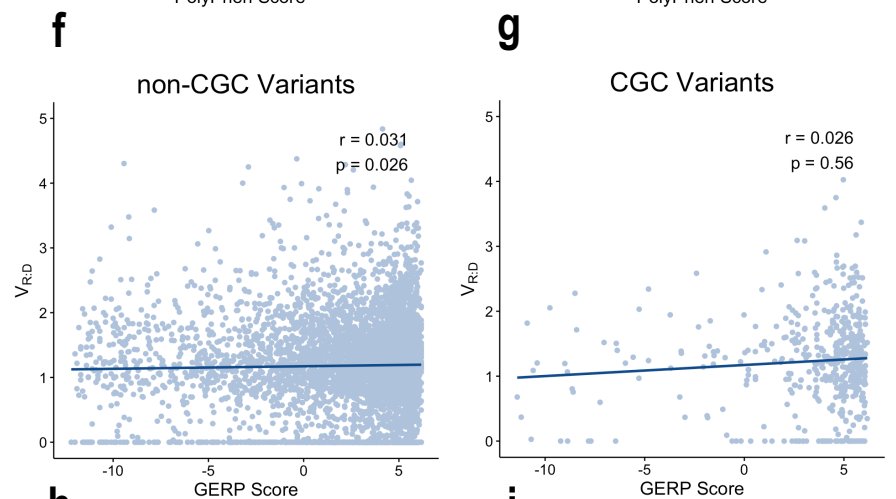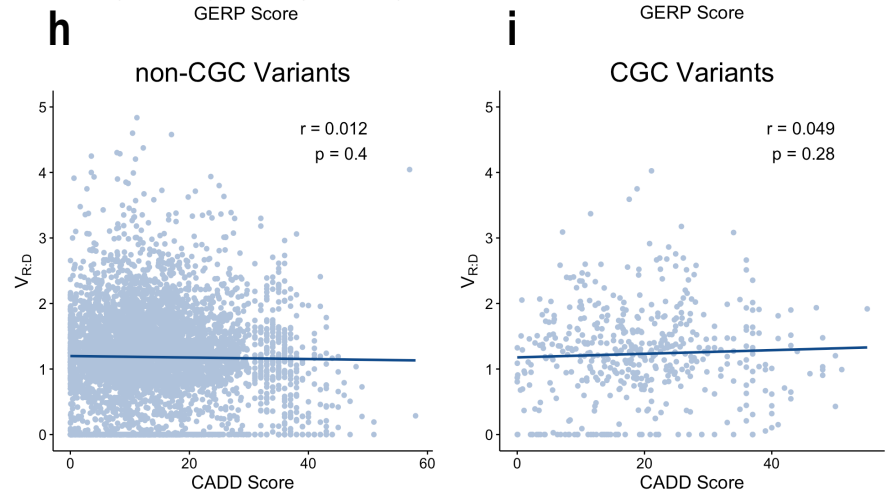

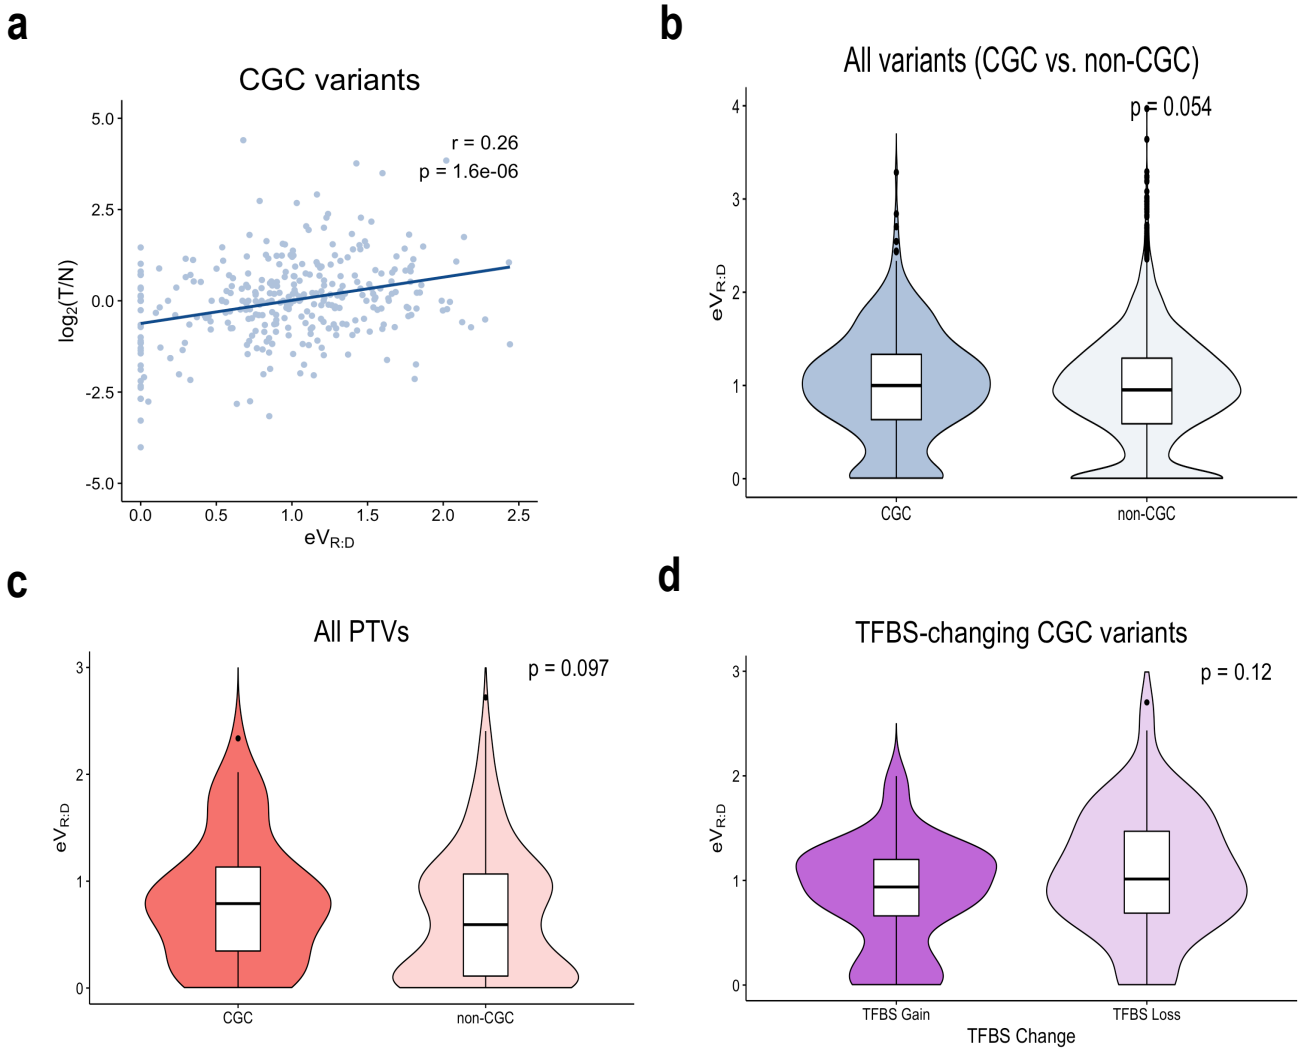

**Supplementary Figure 3.** Analyses of variant allele frequency adjusted through ESTIMATE-assessed purity ( $eV_{R:D}$ ). **a.** Correlation between variant allele fraction and gene expression change. **b.** Distribution of variant allele frequency of CGC- and non-CGC somatic variants. **c.** Distribution of variant allele frequency in PTVs in CGC and those in non-CGC. **d.** Distribution of variant allele frequency in somatic variants that generate a new TFBS and those that destroy an existing TFBS. The results are co-directional with the other purity adjusted estimations.

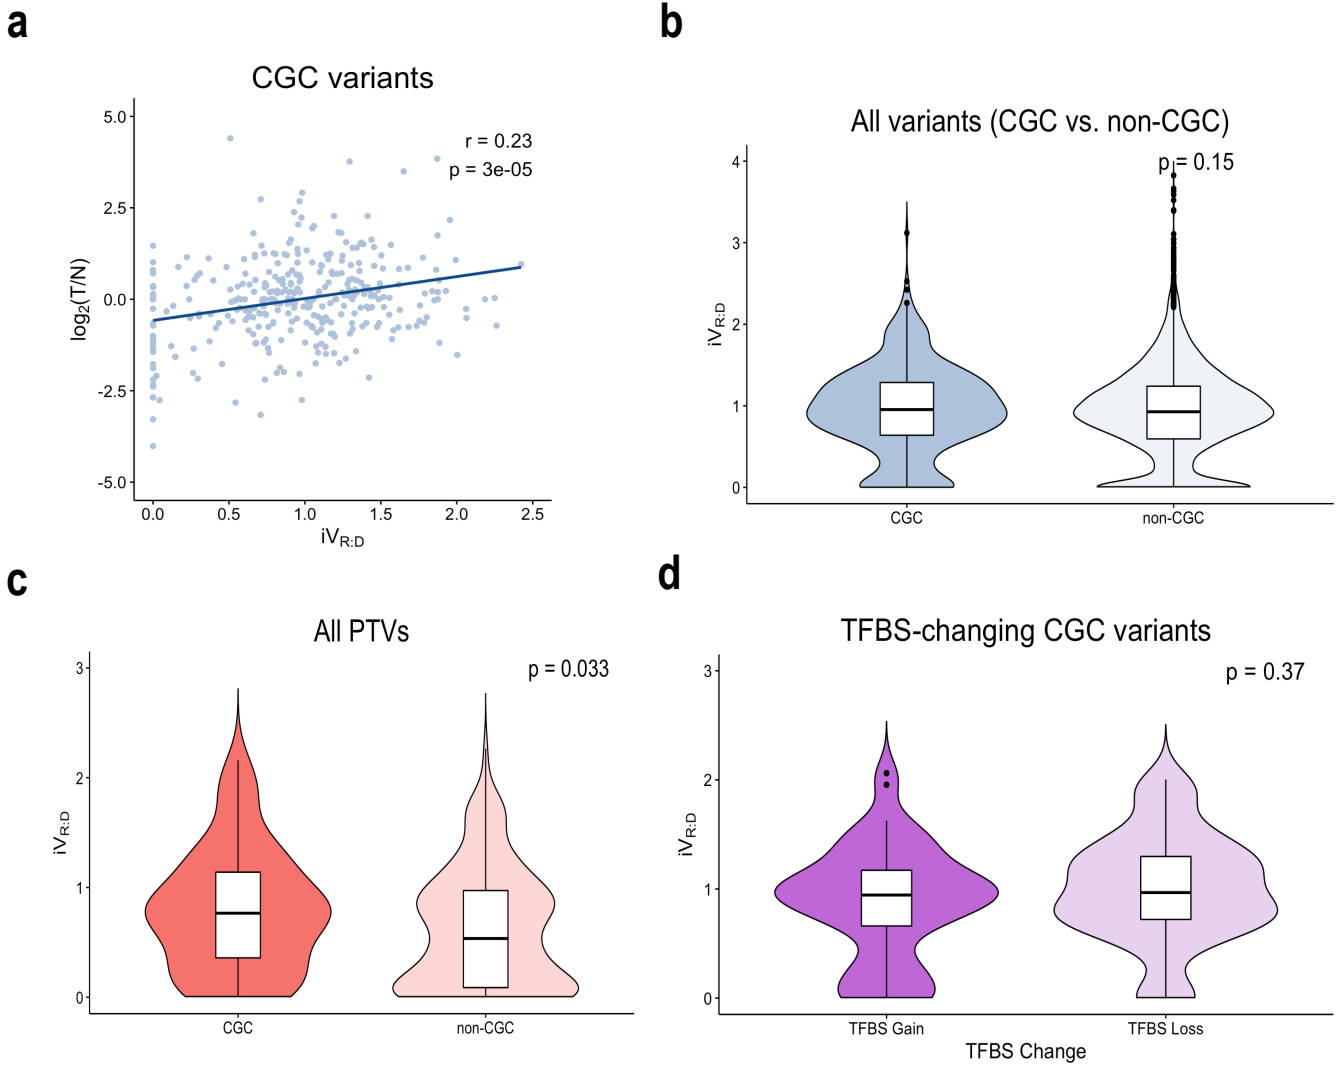

**Supplementary Figure 4.** Analyses of variant allele frequency adjusted through IHC-assessed purity ( $iV_{R:D}$ ). **a.** Correlation between variant allele fraction and gene expression change. **b.** Distribution of variant allele frequency of CGC- and non-CGC somatic variants. **c.** Distribution of variant allele frequency in PTVs in CGC and those in non-CGC. **d.** Distribution of variant allele frequency in somatic variants that generate a new TFBS and those that destroy an existing TFBS. The results are co-directional with the other purity adjusted estimations.

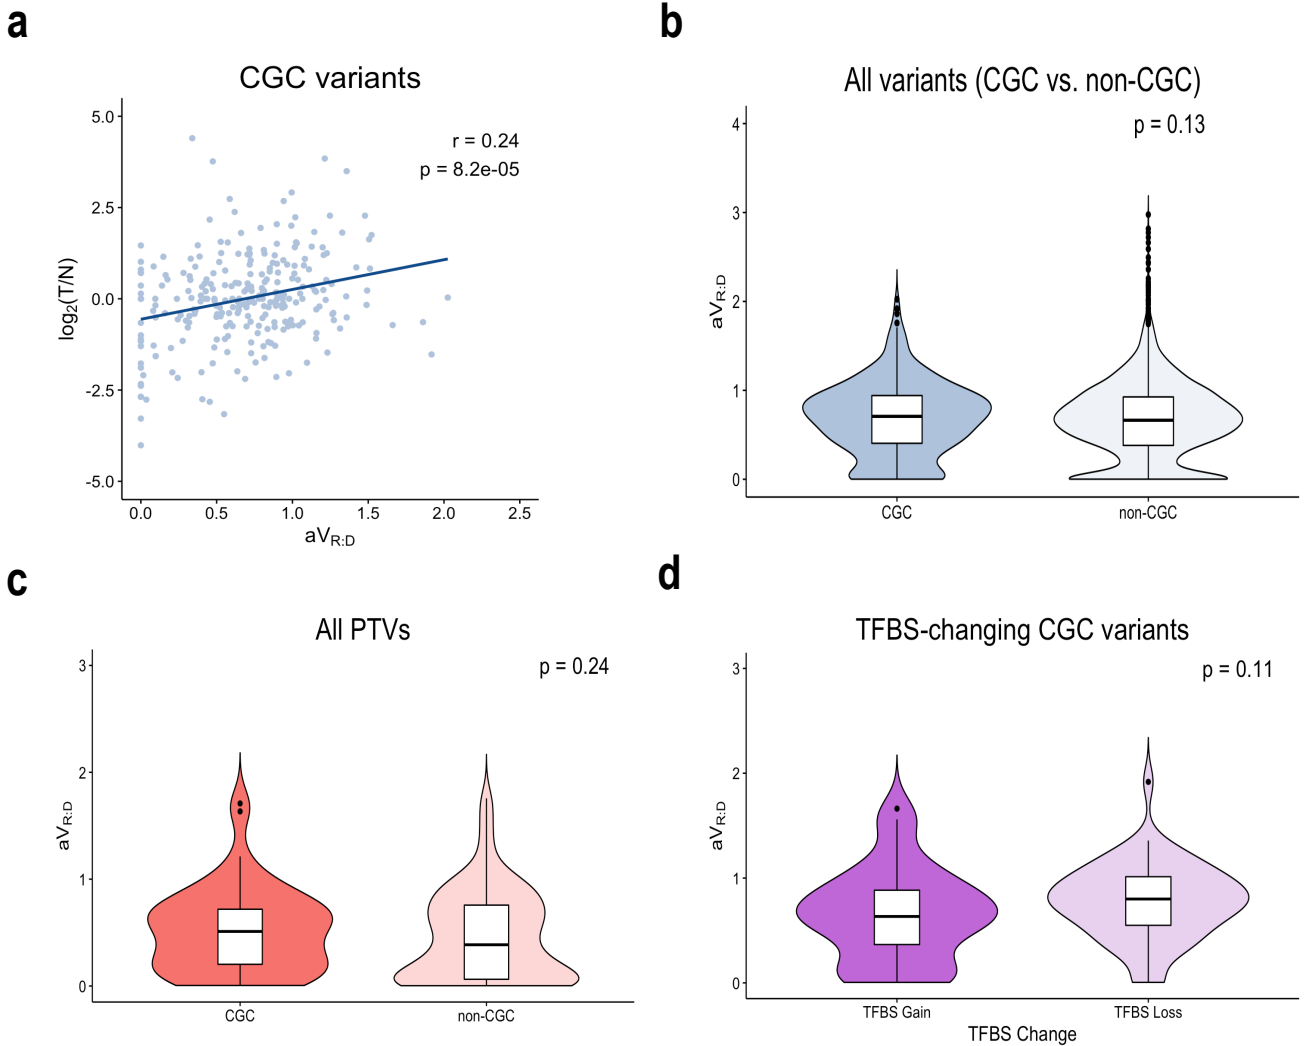

**Supplementary Figure 5.** Analyses of variant allele frequency adjusted through ABSOLUTE-assessed purity ( $aV_{R:D}$ ). **a.** Correlation between variant allele fraction and gene expression change. **b.** Distribution of variant allele frequency of CGC- and non-CGC somatic variants. **c.** Distribution of variant allele frequency in PTVs in CGC and those in non-CGC. **d.** Distribution of variant allele frequency in somatic variants that generate a new TFBS and those that destroy an existing TFBS. The results are co-directional with the other purity adjusted estimations.

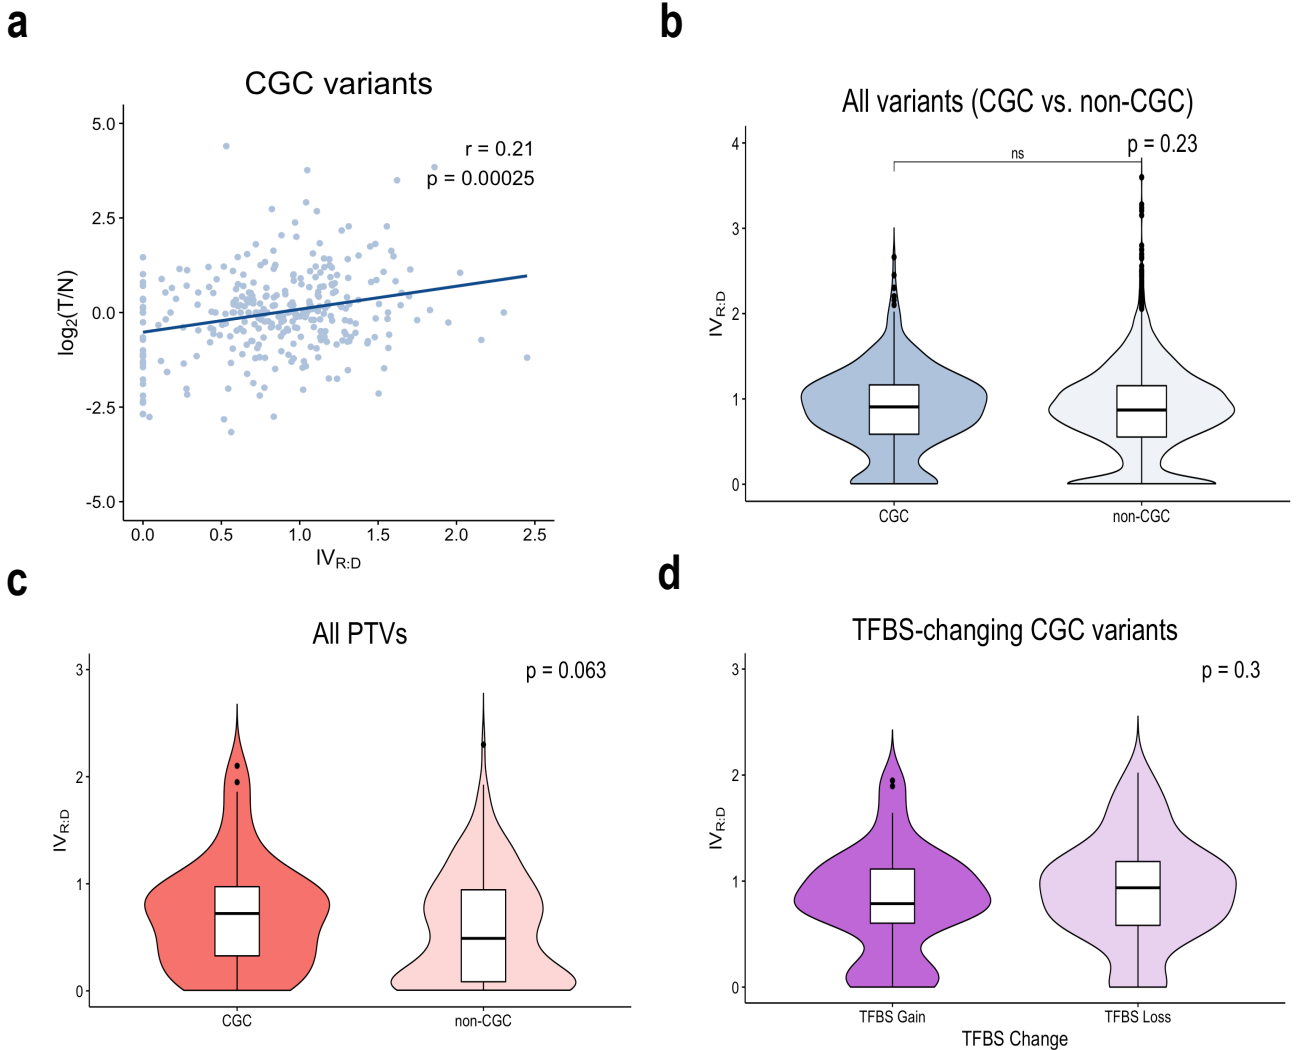

**Supplementary Figure 6.** Analyses of variant allele frequency adjusted through LUMP-assessed purity ( $IV_{R:D}$ ). **a.** Correlation between variant allele fraction and gene expression change. **b.** Distribution of variant allele frequency of CGC- and non-CGC somatic variants. **c.** Distribution of variant allele frequency in PTVs in CGC and those in non-CGC. **d.** Distribution of variant allele frequency in somatic variants that generate a new TFBS and those that destroy an existing TFBS. The results are co-directional with the other purity adjusted estimations.

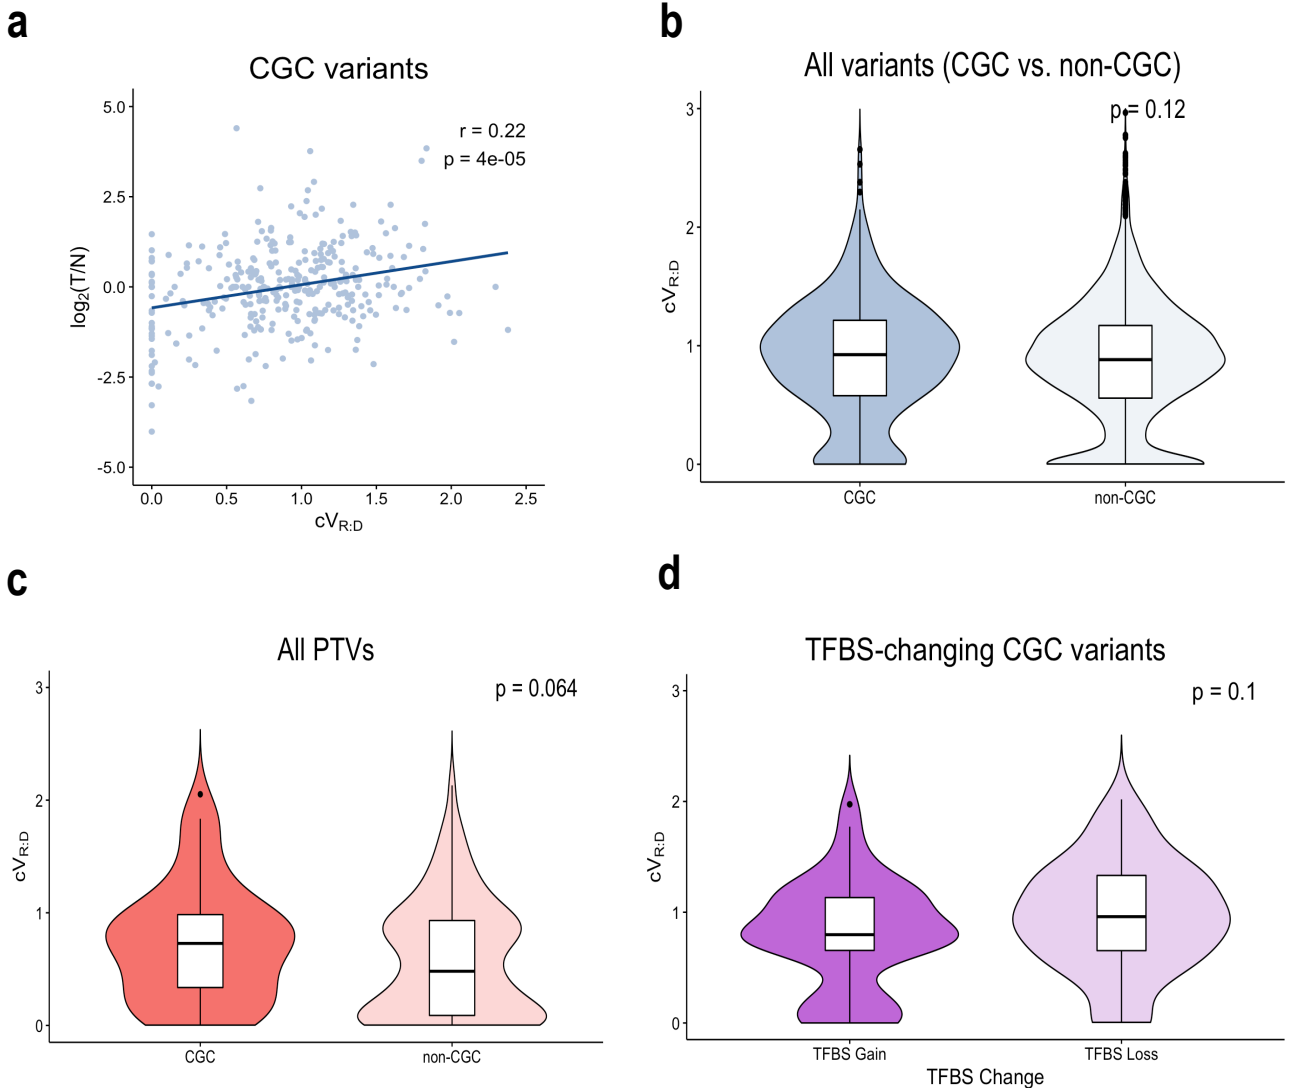

**Supplementary Figure 7.** Analyses of variant allele frequency (relative to DNA,  $cV_{R:D}$ ) adjusted for purity using the Consensus Purity Estimation (CPE). **a.** Correlation between variant allele fraction and gene expression change. **b.** Distribution of variant allele frequency of CGC- and non-CGC somatic variants. **c.** Distribution of variant allele frequency in PTVs in CGC and those in non-CGC. **d.** Distribution of variant allele frequency in somatic variants that generate a new TFBS and those that destroy an existing TFBS. The results are co-directional with the other purity adjusted estimations.



**Supplementary Figure 8.** Distribution of the absolute values of the segment mean ( $\log_2(\text{copy-number}/2)$ ) assessments for CNAs in the loci of the SNVs analyzed in our study between CGC and non-CGC genes in the entire dataset (a), in the subsets of SOM-E (b) and SOM-L (c) somatic variants, and in the subsets of SOM-E PTVs (d) and SOM-L PTVs (e). None of these comparisons showed significantly different distribution of the segment mean absolute values between SNVs in CGC and non-CGC genes.

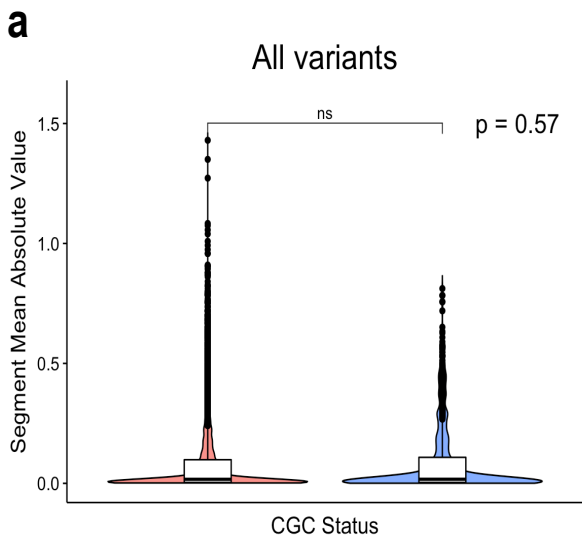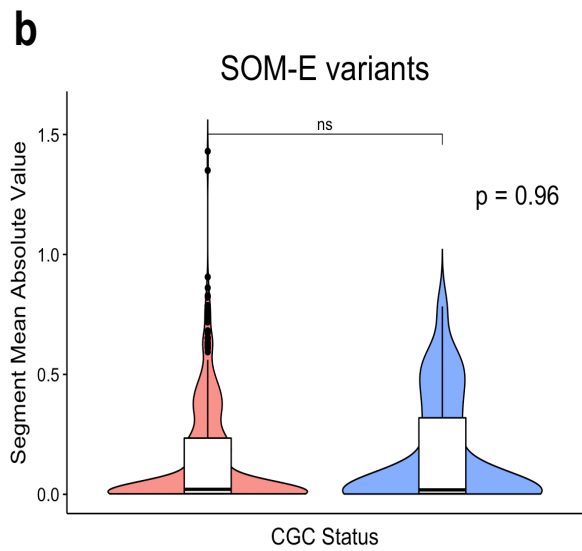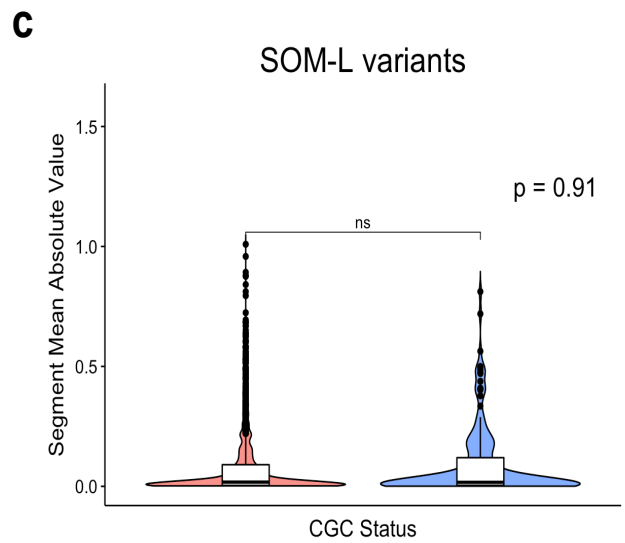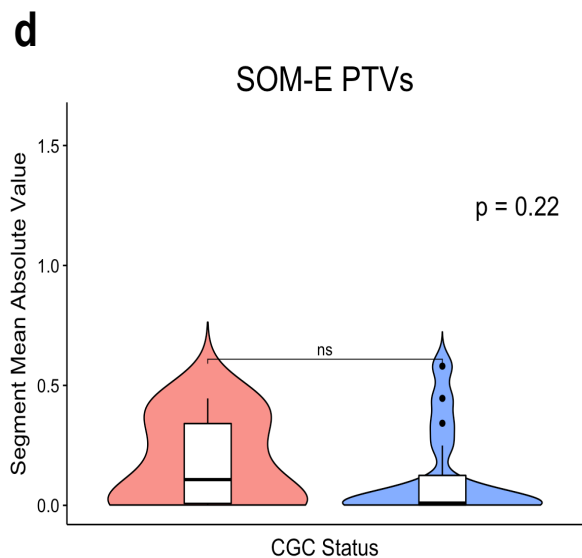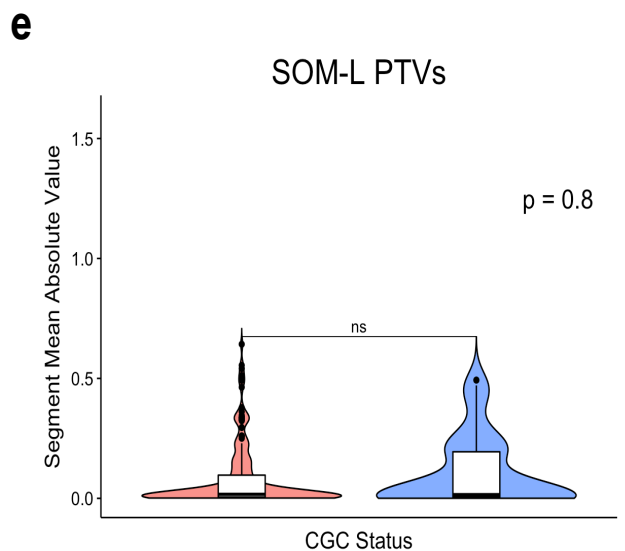

All somatic variants pooled

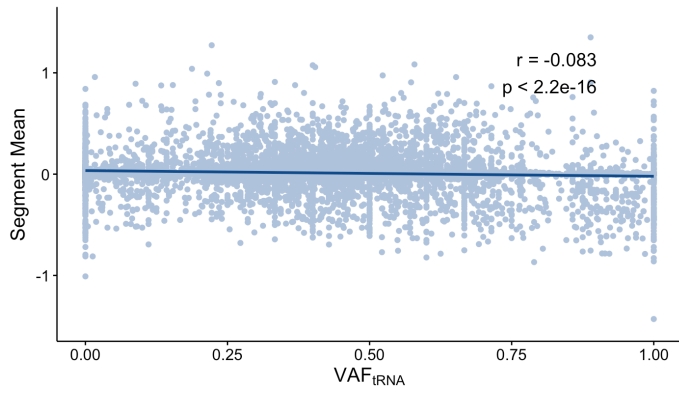

All somatic variants pooled

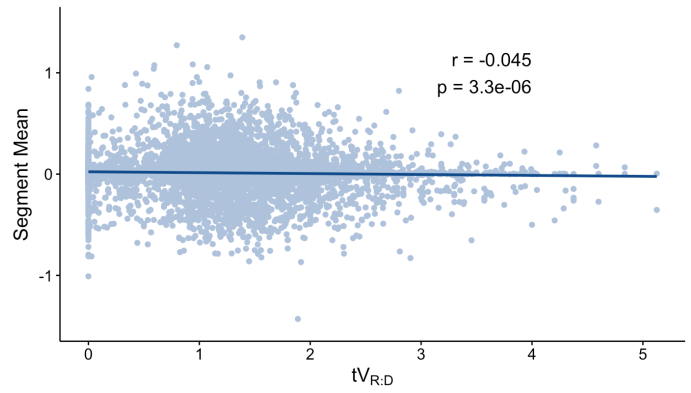

CGC somatic variants

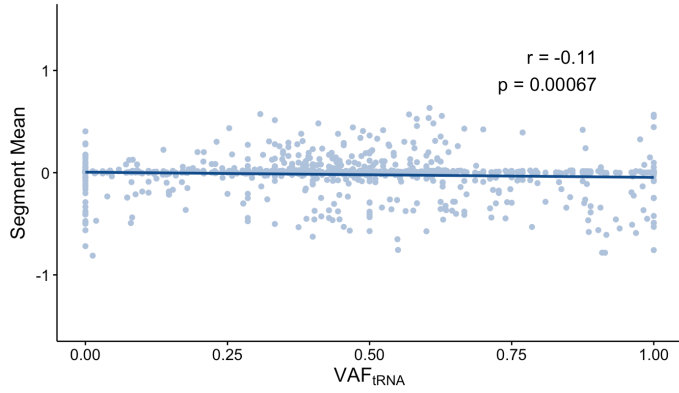

CGC somatic variants

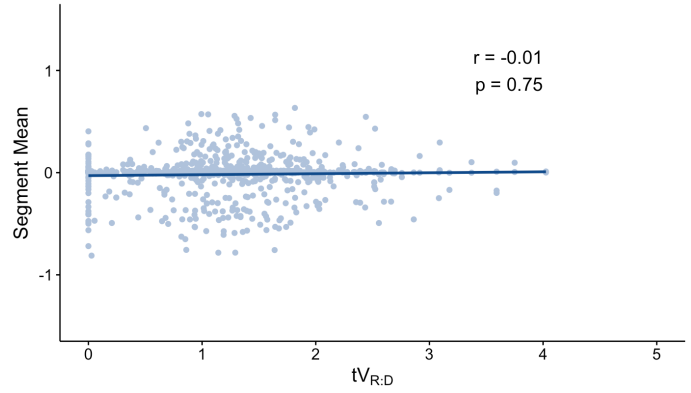

non-CGC somatic variants

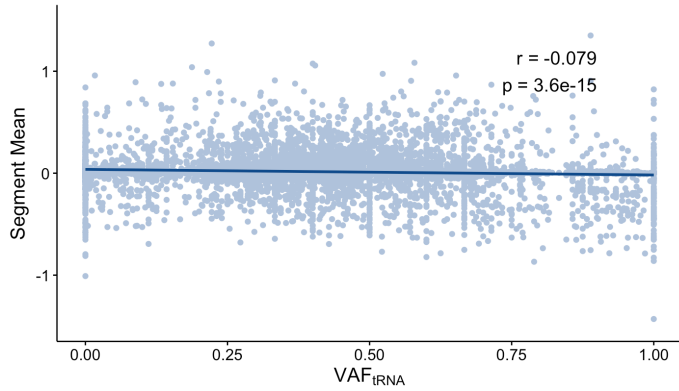

non-CGC somatic variants

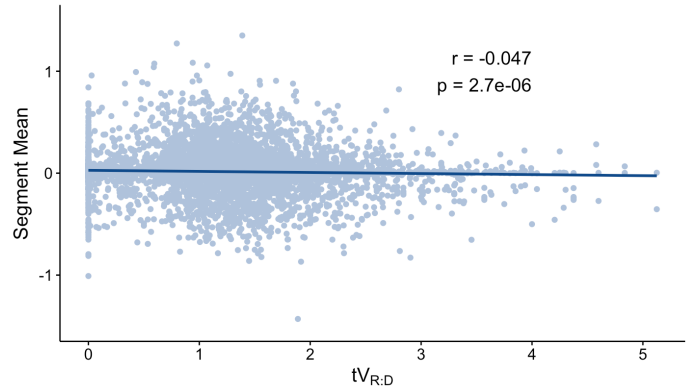

**Supplementary Figure 9a.** Correlation between variant allele frequency ( $VAF_{tRNA}$ , left,  $tv_{R:D}$ , right) in all somatic variants (top), CGC somatic variants (middle) and non-CGC somatic variants (bottom) with segment mean ( $\log_2(\text{copy-number}/2)$ ) assessments for CNAs in the SNV-harboring loci. No positive or negative correlation was observed in any of the subsets.

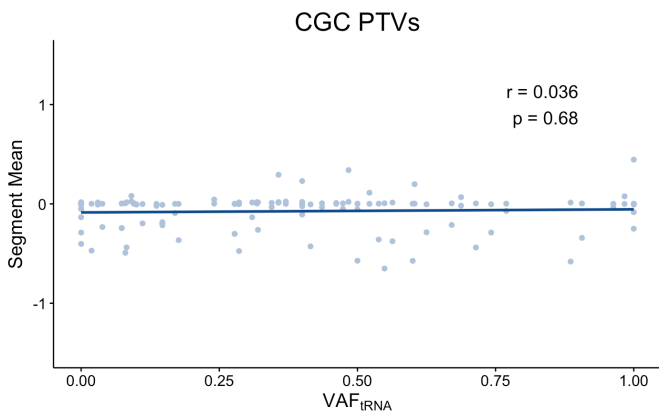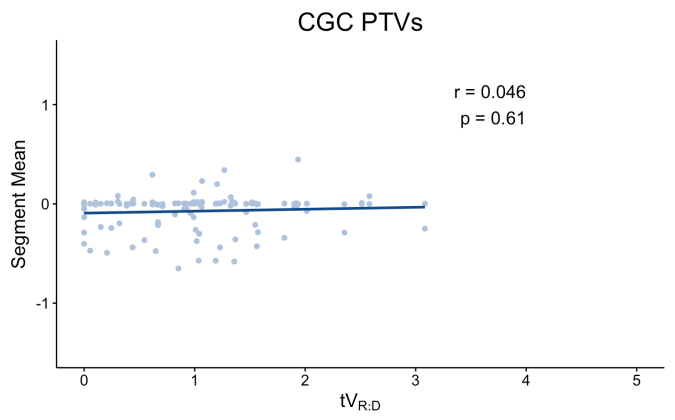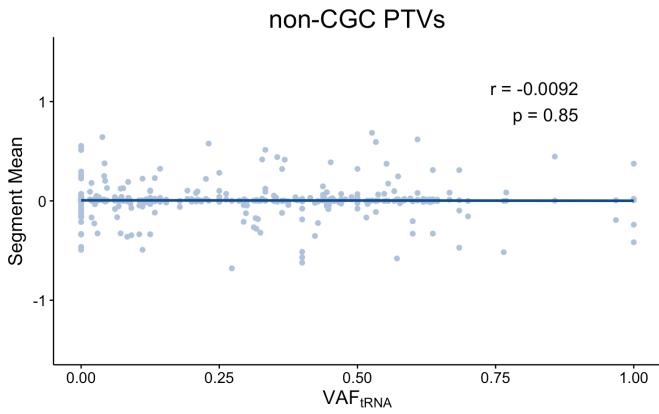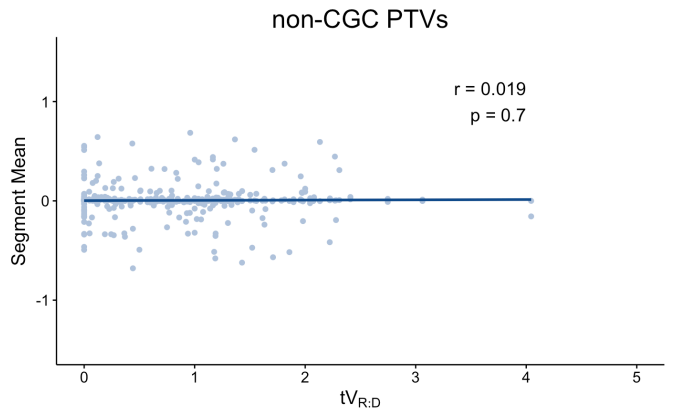

**Supplementary Figure 9b.** Correlation between variant allele frequency ( $VAF_{tRNA}$ , left,  $tV_{R:D}$ , right) in somatic PTVs in CGC genes (top) and non-CGC genes (bottom) with segment mean ( $\log_2(\text{copy-number}/2)$ ) of the harboring loci. No positive or negative correlation was observed in any of the subsets.
